# Supplementary material for: A Database Tool Integrating Genomic and Pharmacologic Data from Adrenocortical Carcinoma Cell Lines, PDX, and Patient Samples
Source: PubMed Central journal article supplement (PMC11389377; doi:10.1158/2767-9764.crc-24-0100), 2024-09-11
Supplement: crc-24-0100_figure_s1_supps1.pdf [file crc-24-0100_figure_s1_supps1.pdf]

Supplement Figure 1 related to Figure 2.

x-Axis Cell Line Set

ACC NCI plus Surgical

x-Axis Data Type

xsq:RNA-seq Expression  
(log2 FPKM+1)

Identifier

ABCB1

y-Axis Cell Line Set

ACC NCI plus Surgical

y-Axis Data Type

act:Drug Activity  
(-log10[IC50(M)])

Identifier

Docetaxel

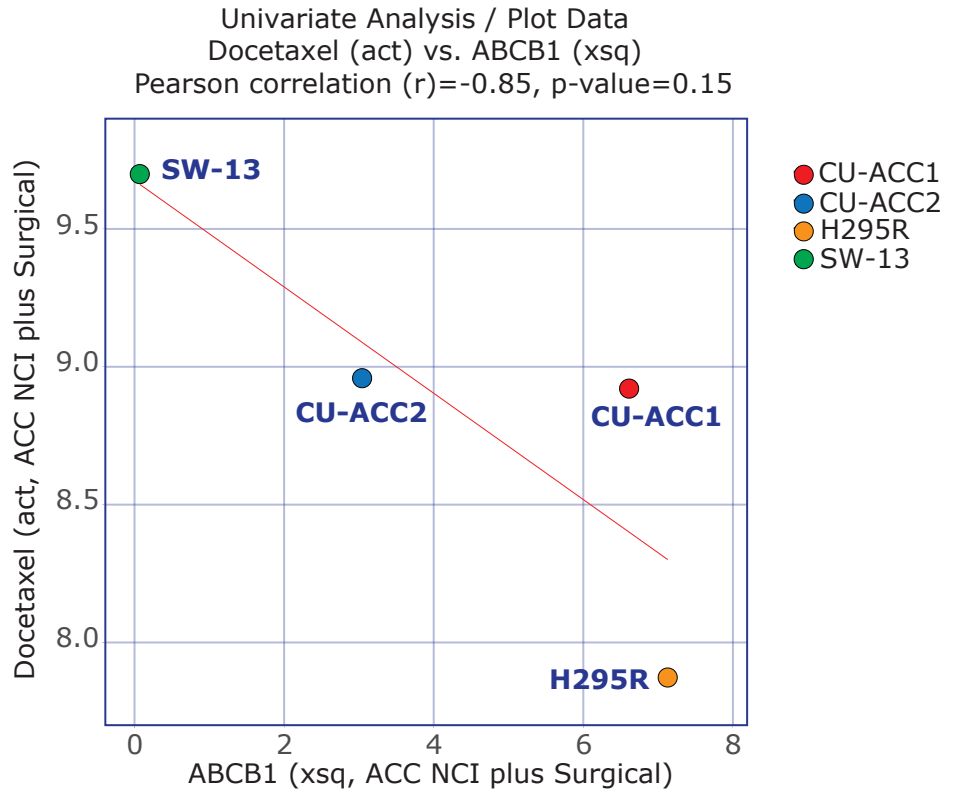

Overexpression of ABCB1 (MDR-1) is correlated with resistance to docetaxel.
