# Supplementary material for: A Database Tool Integrating Genomic and Pharmacologic Data from Adrenocortical Carcinoma Cell Lines, PDX, and Patient Samples
Source: PubMed Central journal article supplement (PMC11389377; doi:10.1158/2767-9764.crc-24-0100), 2024-09-11
Supplement: crc-24-0100_figure_s2_supps2.pdf [file crc-24-0100_figure_s2_supps2.pdf]

Supplement Figure 2 related to Figure 4.

A

x-Axis Cell Line Set

ACC NCI plus Surgical

x-Axis Data Type

mda:Signatures,  
Miscellaneous data

Identifier

ADS

y-Axis Cell Line Set

ACC NCI plus Surgical

y-Axis Data Type

xsq:RNA-seq Expression  
(log2 FPKM+1)

Identifier

NR5A1

Univariate Analysis / Plot Data  
NR5A1 (xsq) vs. ADS (mda)  
Pearson correlation (r)=0.68, p-value=0.03

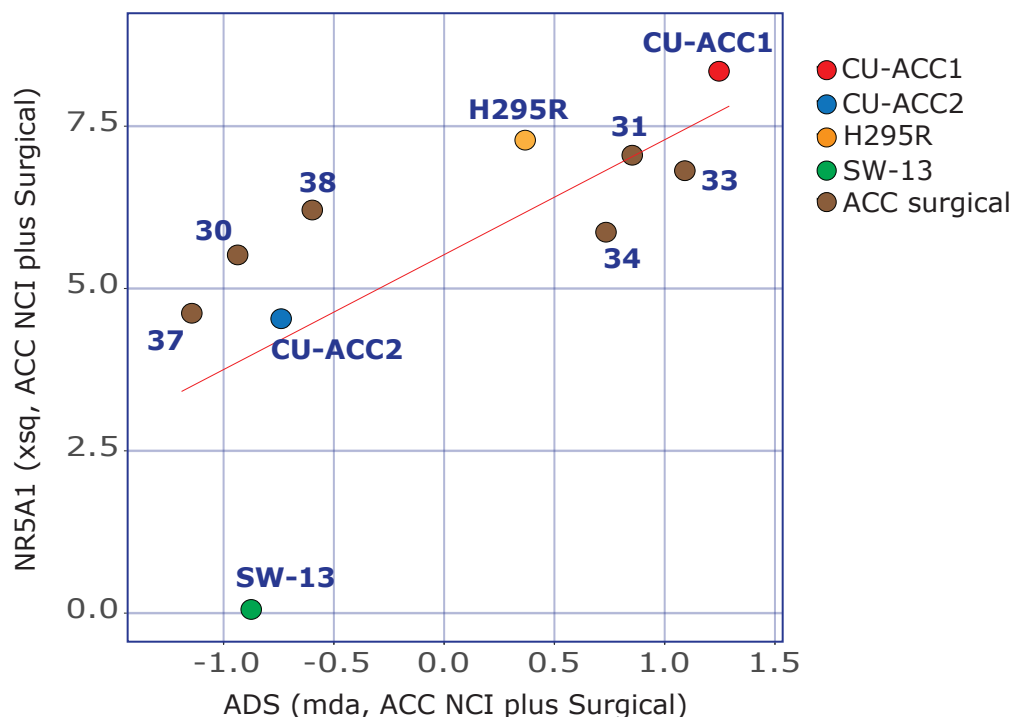

B

x-Axis Cell Line Set

ACC NCI plus Surgical

x-Axis Data Type

xsq:RNA-seq Expression  
(log2 FPKM+1)

Identifier

DLK1

y-Axis Cell Line Set

ACC NCI plus Surgical

y-Axis Data Type

xsq:RNA-seq Expression  
(log2 FPKM+1)

Identifier

IGF2

Univariate Analysis / Plot Data  
IGF2 (xsq) vs. DLK1 (xsq)  
Pearson correlation (r)=0.92, p-value=0.00013

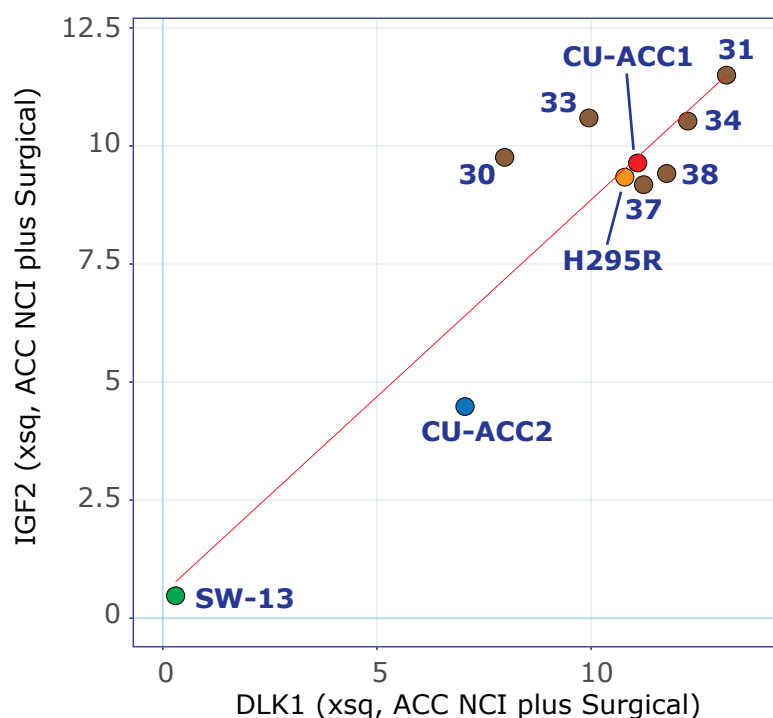

(A) Correlation between the ADS score and the Nuclear Receptor Subfamily 5, Group A, Member 1 NR5A1, which also referred to as Steroidogenic Factor-1 (SF1).

(B) Overexpression of IGF2 in ACC cell lines and tumor samples and correlation with the expression of the surface receptor gene DLK1.
