# Supplementary material for: A Database Tool Integrating Genomic and Pharmacologic Data from Adrenocortical Carcinoma Cell Lines, PDX, and Patient Samples
Source: PubMed Central journal article supplement (PMC11389377; doi:10.1158/2767-9764.crc-24-0100), 2024-09-11
Supplement: crc-24-0100_figure_s3_supps3.pdf [file crc-24-0100_figure_s3_supps3.pdf]

Supplement Figure 3 related to Figure 8

A

x-Axis Cell Line Set

ACC Colorado plus PDX

x-Axis Data Type

xsq:RNA-seq Expression  
(log2 FPKM+1)

Identifier

**MSH2**

y-Axis Cell Line Set

ACC Colorado plus PDX

y-Axis Data Type

xsq:RNA-seq Expression  
(log2 FPKM+1)

Identifier

**MSH6**

Univariate Analysis / Plot Data  
MSH6 (xsq) vs. MSH2 (xsq)

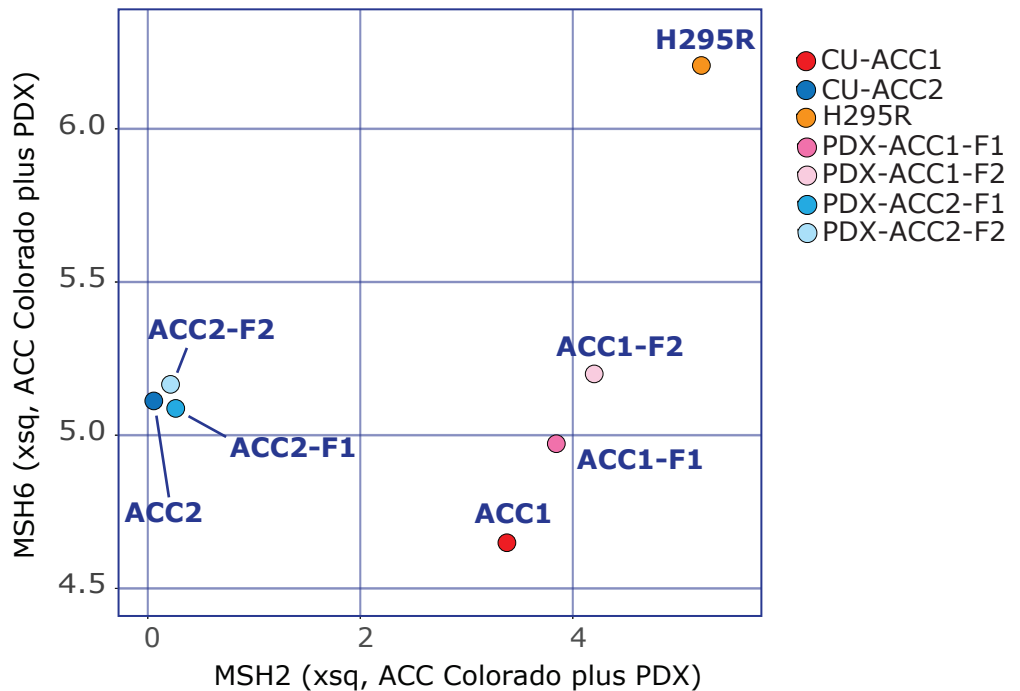

B

x-Axis Cell Line Set

ACC NCI plus Surgical

x-Axis Data Type

act:Drug Activity  
(-log10[IC50M])

Identifier

**Temozolomide**

y-Axis Cell Line Set

NCATS AUC

y-Axis Data Type

act: Drug Activity  
(negative z-score AUC)

Identifier

**Temozolomide**

Univariate Analysis / Plot Data  
Temozolomide (NCI) vs. temozolomide (NCATS)  
Pearson correlation (r)=1, p-value=0.057

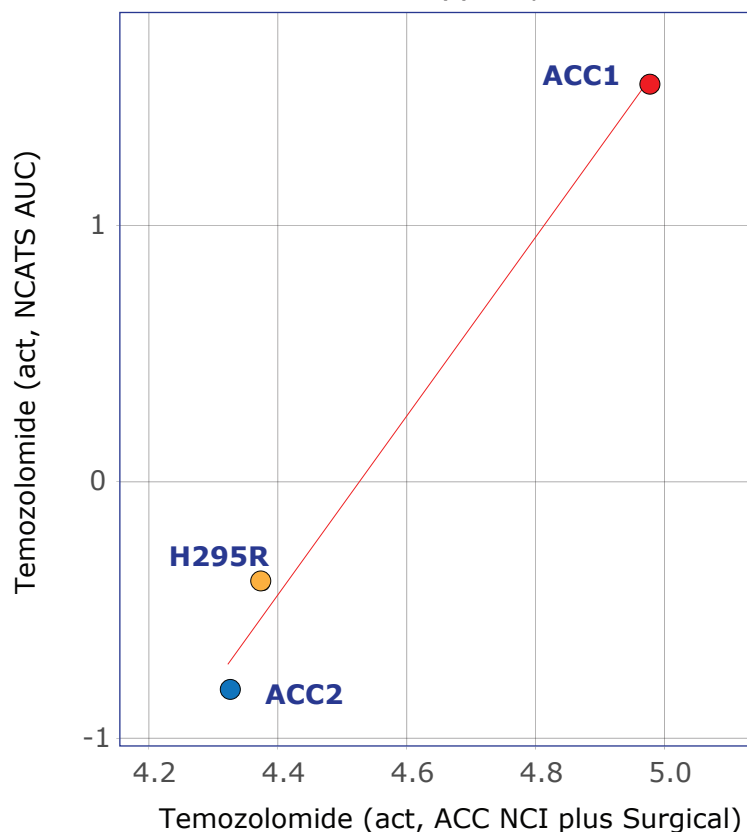

(A) Mismatch repair deficiencies in the ACC2 cell line and its related PDXs.

(B) Sensitivity and resistance of CU-ACC1 and CU-ACC2 and NCI-H295R to temozolomide both in the NCI and NCATS databases. Resistance of ACC2 is related to lack of MSH2 expression in CU-ACC2 (see Figure 8B).
