# Supplementary material for: A Database Tool Integrating Genomic and Pharmacologic Data from Adrenocortical Carcinoma Cell Lines, PDX, and Patient Samples
Source: PubMed Central journal article supplement (PMC11389377; doi:10.1158/2767-9764.crc-24-0100), 2024-09-11
Supplement: crc-24-0100_figure_s4_supps4.pdf [file crc-24-0100_figure_s4_supps4.pdf]

## Supplement Figure 4

A

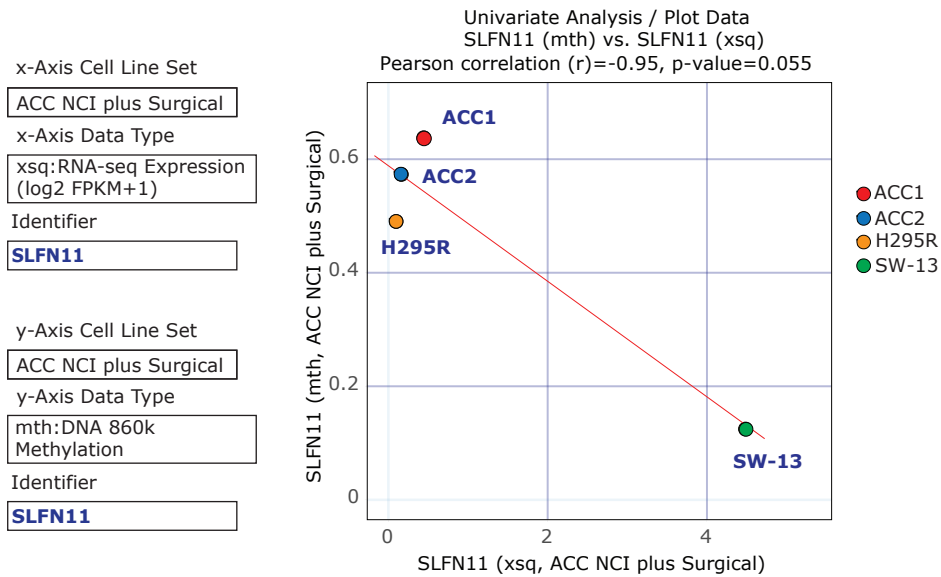

B

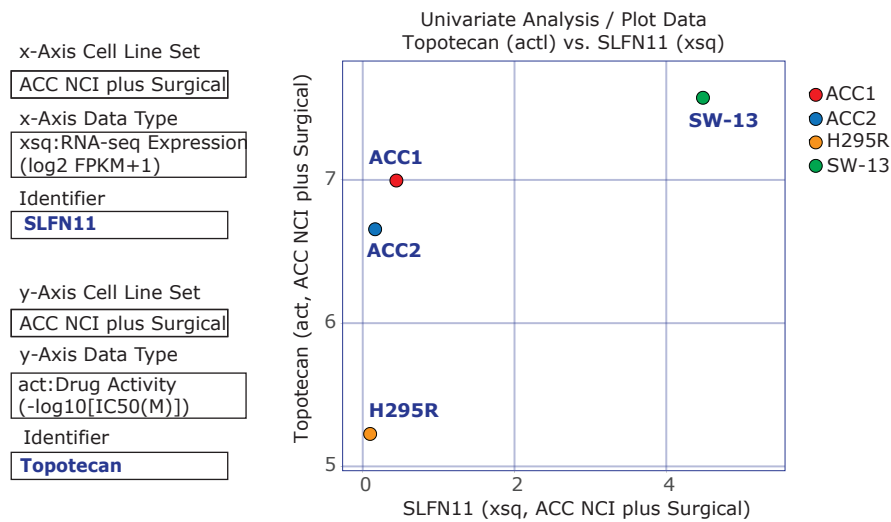

C

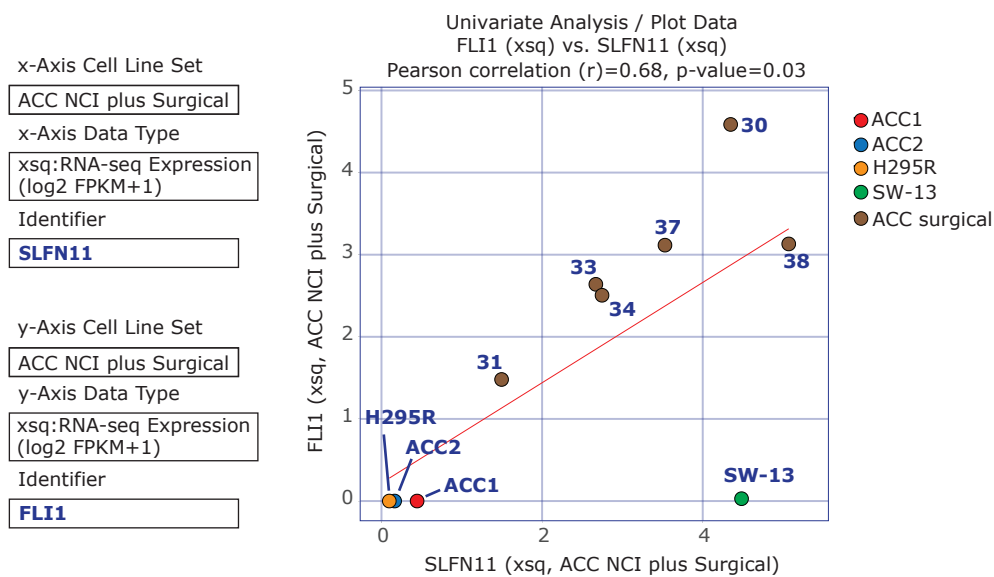

- (A) Lack of SLFN11 expression in the ACC cell lines CU-ACC1, CU-ACC2 and NCI-H295R is related to promoter hypermethylation.
- (B) SW-13 cells, which express SLFN11 are the most sensitive to topotecan.
- (C) Lack of SLFN11 expression and of its transcription factor FLI1 in the ACC cell lines and correlation between SLFN11 and FLI1 expression in the ACC surgical samples.
